# Supplementary material for: An atomistic study of a poly(styrene sulfonate)/poly(diallyldimethylammonium) bilayer: the role of surface properties and charge reversal
Source: Royal Society of Chemistry journal article supplement (doi:10.1039/c1cp21777a), 2011-01-01
Supplement: c1cp21777a.pdf [file c1cp21777a.pdf]

# An Atomistic Study of a Poly(styrene sulfonate)/Poly(diallyldimethylammonium) Bilayer: The Role of Surface Properties and Charge Reversal

Baofu Qiao\*, Marcello Sega and Christian Holm\*

*Institute for Computational Physics, Universität Stuttgart, Pfaffenwaldring 27, 70569  
Stuttgart, Germany*

In Table S1, given are the average number of monomers adsorbed in the 1<sup>st</sup> and 2<sup>nd</sup> deposition cycles. The rinsed PSS monolayer was composing of the 1<sup>st</sup> deposition cycle. For the 2<sup>nd</sup> deposition cycle, only those monomers on strongly adsorbed PDADMA chains were taken into consideration. In the present work, a PDADMA chain is defined to be strongly adsorbed if at least one of its nitrogen atoms is located in the region of  $z \leq 2.5$  nm from the adsorbing surface (see Fig. 6 in the main text).

TABLE S1. Average number of adsorbed monomers in the 1<sup>st</sup>/2<sup>nd</sup> deposition cycle <sup>a</sup>

| surface          |                    | $\langle N_{PSS} \rangle$ | $\langle N_{PDADMA} \rangle$ |
|------------------|--------------------|---------------------------|------------------------------|
| P/H <sup>b</sup> | $Q_s$ <sup>c</sup> |                           |                              |
| P                | 0                  | 64                        | 86                           |
| P                | 16                 | 84                        | 69                           |
| P                | 36                 | 76                        | 75                           |
| H                | 0                  | 60                        | 74                           |
| H                | 16                 | 76                        | 75                           |
| H                | 36                 | 88                        | 82                           |

<sup>a</sup> The standard deviations are less than 20% of the corresponding average values.

<sup>b</sup> P/H represents system with hydroxylated/non-hydroxylated adsorbing surface, respectively.

<sup>c</sup> Number of surface charges (in unit of e).
